# Supplementary material for: Non-Invasive Differentiation of M1 and M2 Activation in Macrophages Using Hyperpolarized 13C MRS of Pyruvate and DHA at 1.47 Tesla
Source: MDPI journal article supplement (doi:10.3390/metabo11070410), 2021-06-22
Supplement: s1 [file s1]

## Supplementary Figures

Supplementary Figure S1

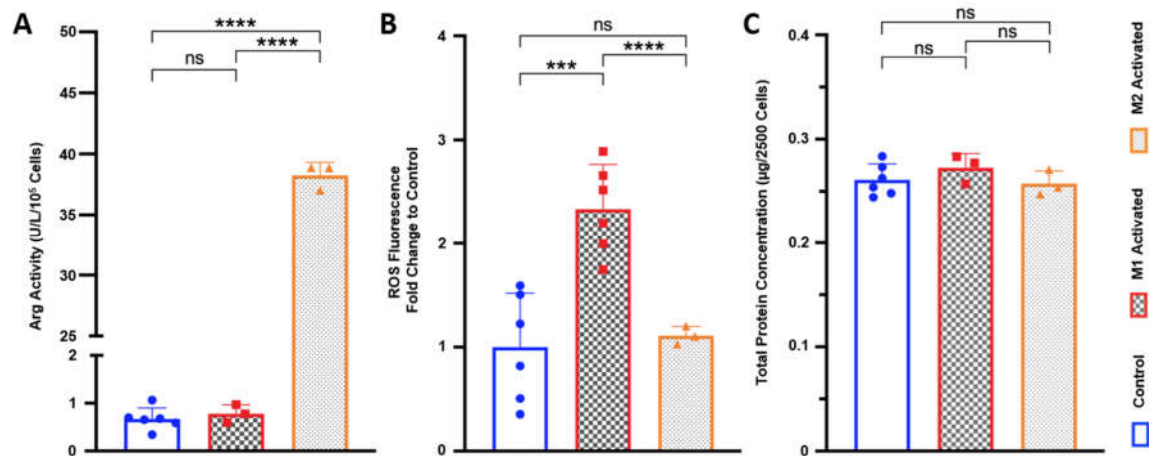

**Supplementary Figure S1. M1 and M2 activation of J774a.1 macrophages.** (A) Arginase (Arg) activity in Units (where 1 Unit = amount of arginase that will generate 1.0 nmol of H<sub>2</sub>O<sub>2</sub>/min at 37°C) for control (blue), M1 activated (red) and M2 activated (orange) macrophages (ns:  $p = 0.849$ , \*\*\*\* $p < 0.0001$ ). (B) Reactive oxygen species (ROS) fluorescence levels between control (blue), M1 activated, (red) and M2 activated (orange) J774a.1 macrophages, expressed in fold change compared to control (ns:  $p = 0.738$ , \*\*\* $p < 0.001$ , \*\*\*\* $p < 0.0001$ ). (C) Total protein concentrations normalized to cell numbers for control (blue), M1 activated, (red) and M2 activated (orange) J774a.1 macrophages (ns control vs M1:  $p = 0.309$ ; ns control vs M2:  $p = 0.721$ ; ns M1 vs M2:  $p = 0.229$ ).
